# Supplementary material for: Dnd1 Knockout in Sturgeons By CRISPR/Cas9 Generates Germ Cell Free Host for Surrogate Production
Source: PubMed Central journal article supplement (PMC6523263; doi:10.3390/ani9040174), 2019-04-17

# Generation of gRNA by overlap PCR

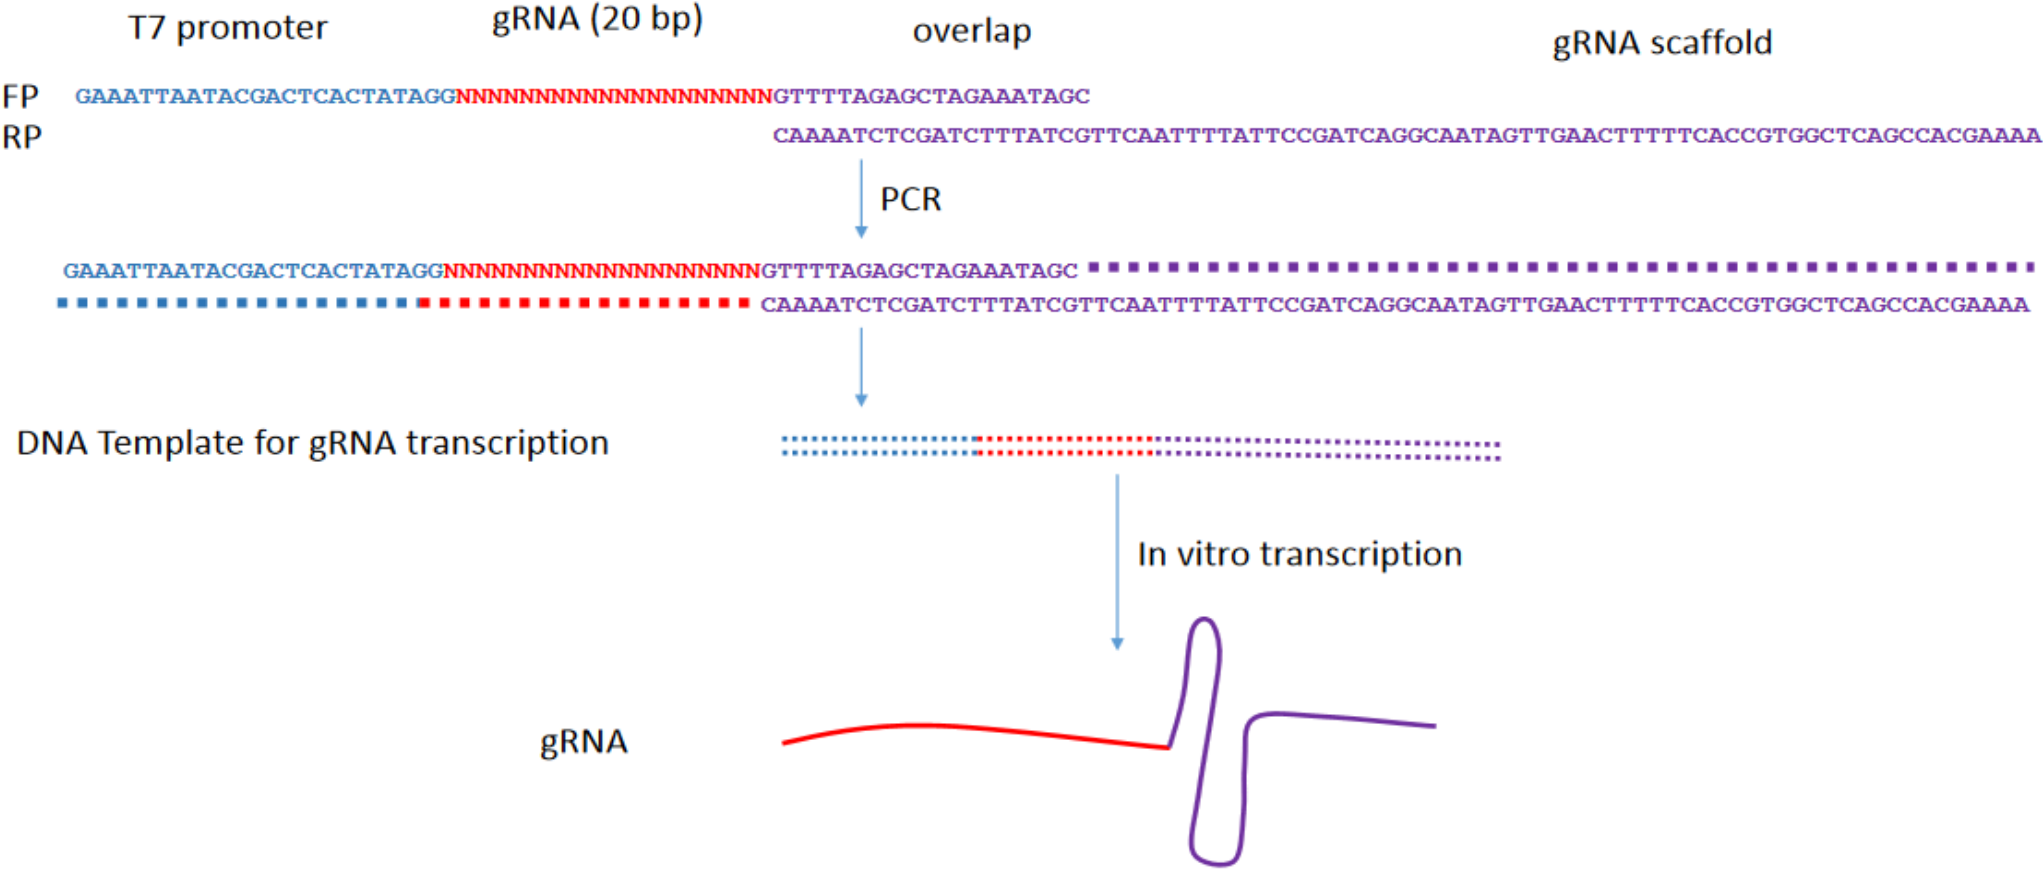

Supplement: animals-09-00174-s001.pdf [file animals-09-00174-s001.pdf]
